# Supplementary material for: Reaction of H2 with polyoxometalate supported Rhodium(0) and Iridium(0) nanoparticles in aqueous suspensions: a kinetic study
Source: Royal Society of Chemistry journal article supplement (doi:10.1039/d2nj02253b), 2022-01-01
Supplement: d2nj02253b1.pdf [file d2nj02253b1.pdf]

## Supporting Information

### Reaction of H<sub>2</sub> with Polyoxometalate supported Rhodium(0) and Iridium(0) Nanoparticles in aqueous suspensions: A kinetic Study

- <sup>a</sup> Department of Chemical Sciences and The Radical Research Center  
Ariel University, Ariel, Israel. E-mail:
- <sup>b</sup> Chemistry Department  
Ben-Gurion University, Beer-Sheva, Israel
- <sup>c</sup> Department of Chemical Sciences  
Ariel University, Ariel, Israel
- <sup>d</sup> Department of Chemical Engineering and The Radical Research Center  
Ariel University, Ariel, Israel.  
E-mail: [yaelyt@ariel.ac.il](mailto:yaelyt@ariel.ac.il)

#### Table of contents

|                                                          |    |
|----------------------------------------------------------|----|
| Sample preparation for HR-TEM and NMR spectroscopy ..... | 2  |
| Figure S1 .....                                          | 3  |
| Figure S2 .....                                          | 4  |
| Figure S3 .....                                          | 4  |
| Figure S4 .....                                          | 5  |
| Table S1 .....                                           | 5  |
| Figure S5 .....                                          | 6  |
| Table S2 .....                                           | 6  |
| Figure S6 .....                                          | 7  |
| Table S3 .....                                           | 7  |
| Figure S7 .....                                          | 8  |
| Table S4 .....                                           | 8  |
| Figure S8 .....                                          | 9  |
| Table S5 .....                                           | 9  |
| Figure S9 .....                                          | 10 |
| Table S6 .....                                           | 10 |
| Figure S10 .....                                         | 11 |
| Table S7 .....                                           | 11 |
| Figure S11 .....                                         | 12 |
| Table S8 .....                                           | 12 |

## Sample preparation for High-Resolution TEM (HR-TEM)

The Rh<sup>0</sup> NPs, Rh<sup>0</sup>-POM, Ir<sup>0</sup> NPs, and Ir<sup>0</sup>-POM nanoparticles were characterized using HR TEM (JEOL 2100, operated at 200 KeV,) equipped with an EDS system for composition analysis. The samples were synthesized by dispersing the NPs in an isopropanol-water mixture and placing one drop of the suspension onto a 400 mesh copper grid. The grids were dried in the air before the measurement was done.

## NMR Spectroscopy

The NMR spectra were measured on a 400 MHz Bruker Avance III HD (<sup>1</sup>H 400MHz and <sup>31</sup>P 162MHz) spectrometer equipped with a 5 mm tunable broadband probe (BBFO). All the samples were dissolved in solutions of H<sub>2</sub>O (90%)/D<sub>2</sub>O (10%), the NMR experiments were performed at 300 K.

<sup>1</sup>H NMR spectra were measured using a pre-saturation experiment (*zgpr*) and the remaining signal for water was used as an internal reference (4.79 ppm for H<sub>2</sub>O), for the chemical shifts. ([Rh] and [Ir] = 0.25 mM)

<sup>31</sup>P{<sup>1</sup>H} NMR spectra were measured using a proton decoupling experiment (*zpgg*) with an equal number of scans among all the samples. A solution of 85% H<sub>3</sub>PO<sub>4</sub> in H<sub>2</sub>O (0 ppm for <sup>31</sup>PO<sub>4</sub>) was used as an external reference. ([Rh] and [Ir] = 0.125 mM, [POM] = 10.0 mM)

## Calculations for the number of Rh and Ir atoms on the surface

[NP] = C/ n, where C = Concentration of M<sup>0</sup> (Rh<sup>0</sup> and Ir<sup>0</sup>), based on the metal precursors, n = number of M atoms per particle

$$n = \frac{4}{3} \pi r^3 \frac{N}{M.W} \rho$$

For Rh,

$$\rho_{Rh} = 12.41 \text{ g/cm}^3$$

$$M.W. = 102.90 \text{ g/mol}$$

$$\text{Diameter of Rh nanoparticle} = 2.4 \text{ nm} \quad r = 1.20 \text{ nm} = 1.20 \times 10^{-7} \text{ cm}$$

From the calculations,

$n = 525.0$  Rh atoms/ Rh NPs

Therefore,

Number of Rh atoms on the surface of the NPs ( $n_s$ ),

$$n_s = n \left[ \frac{r^3 - (r - 2r_{\text{Rh}})^3}{r^3} \right] \quad r_{\text{Rh}} = 1.34 \text{ \AA} = 1.34 \times 10^{-8} \text{ cm} \quad r = 1.20 \times 10^{-9} \text{ m} = 1.20 \times 10^{-7} \text{ cm}$$

$n_s = 279$  Number of Rh atoms on the surface of one NP.

For Ir

$\rho_{\text{Ir}} = 22.56 \text{ g/cm}^3$ , M.W. = 192.21 g/mol and  $r = 1.25 \text{ nm}$

From the calculations,

$n = 578$  Ir atoms per Ir particle and  $n_s = 298$  atoms/particle

## $^1\text{H}$ NMR

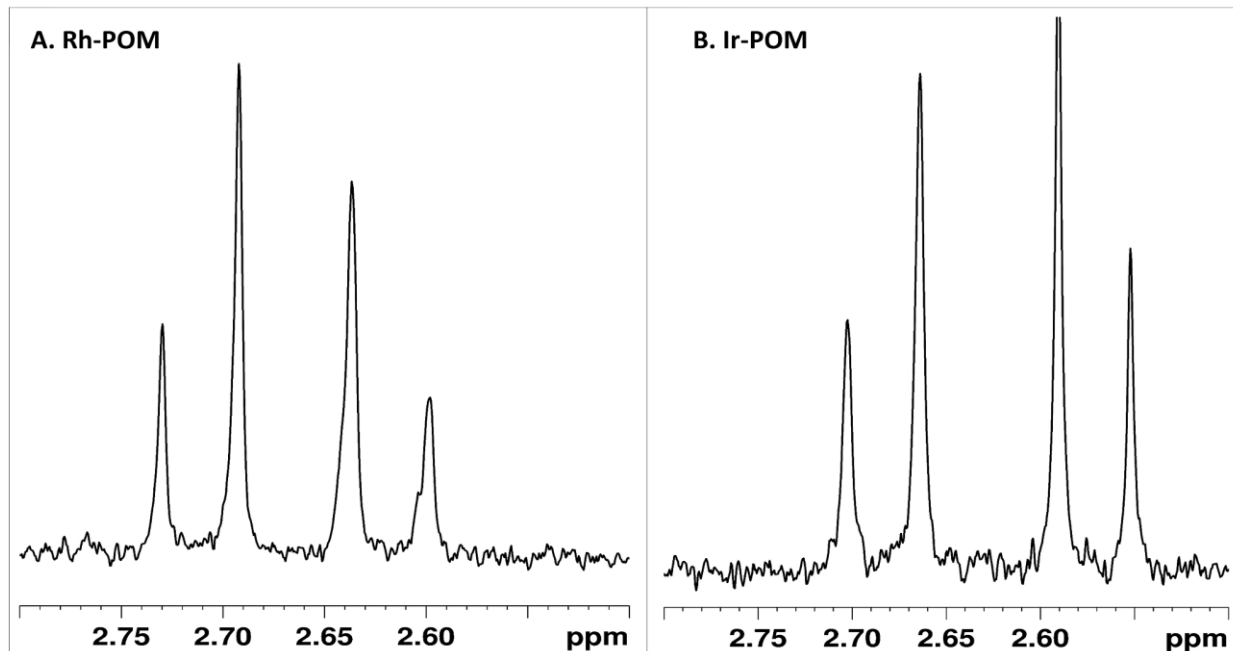

**Figure S1.**  $^1\text{H}$  NMR (400 MHz, 90 %  $\text{H}_2\text{O}/10$  %  $\text{D}_2\text{O}$ , 300 K) spectrum of synthesized Rh and Ir nanoparticles (0.125 mM). The peaks show the presence of citrate.

## $^{31}\text{P}$ NMR

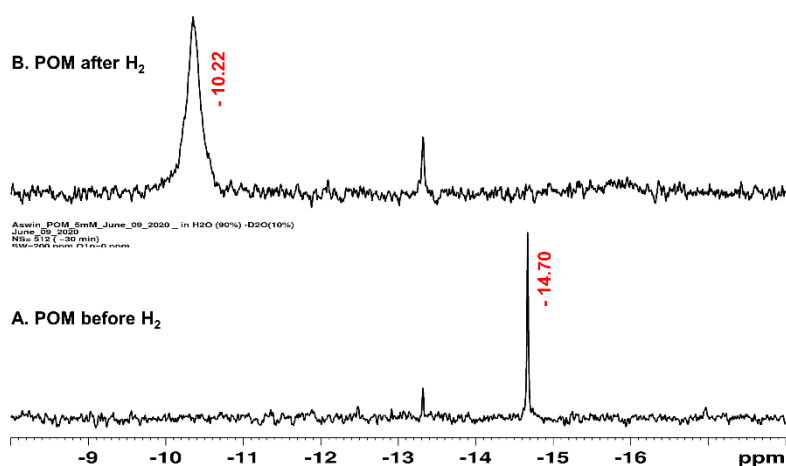

Figure S2.  $^{31}\text{P}$  NMR (162 MHz, 90%  $\text{H}_2\text{O}/10\%$   $\text{D}_2\text{O}$ , 300 K) spectra of bare POM (A) Before  $\text{H}_2$  and (B) After  $\text{H}_2$ .

## Kinetics of bare POM with $\text{H}_2$

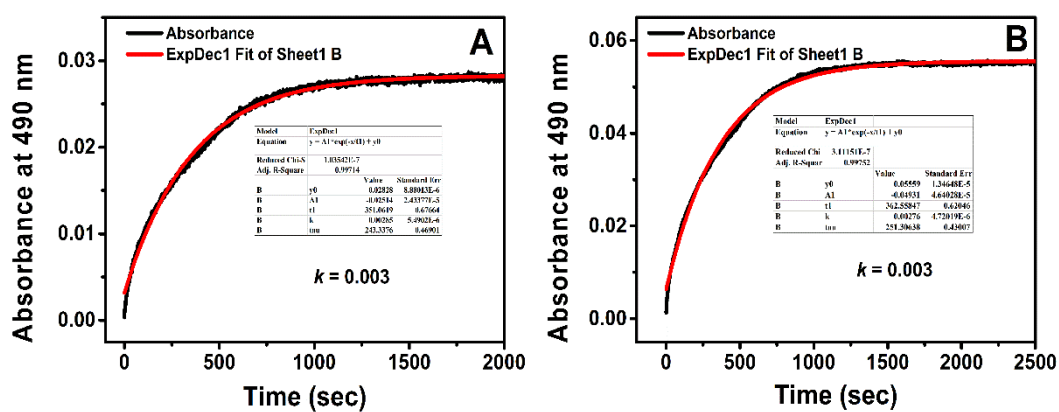

Figure S3. Typical kinetic curves of the reaction of  $\text{PW}_{12}\text{O}_{40}^{3-}$  with  $\text{H}_2$  (A)  $1.0 \times 10^{-4}$  M POM and (B)  $2.0 \times 10^{-4}$  M POM.

# Rh<sup>0</sup>NP@POM-H<sub>2</sub> (2.40 nm Rh)

## POM dependence

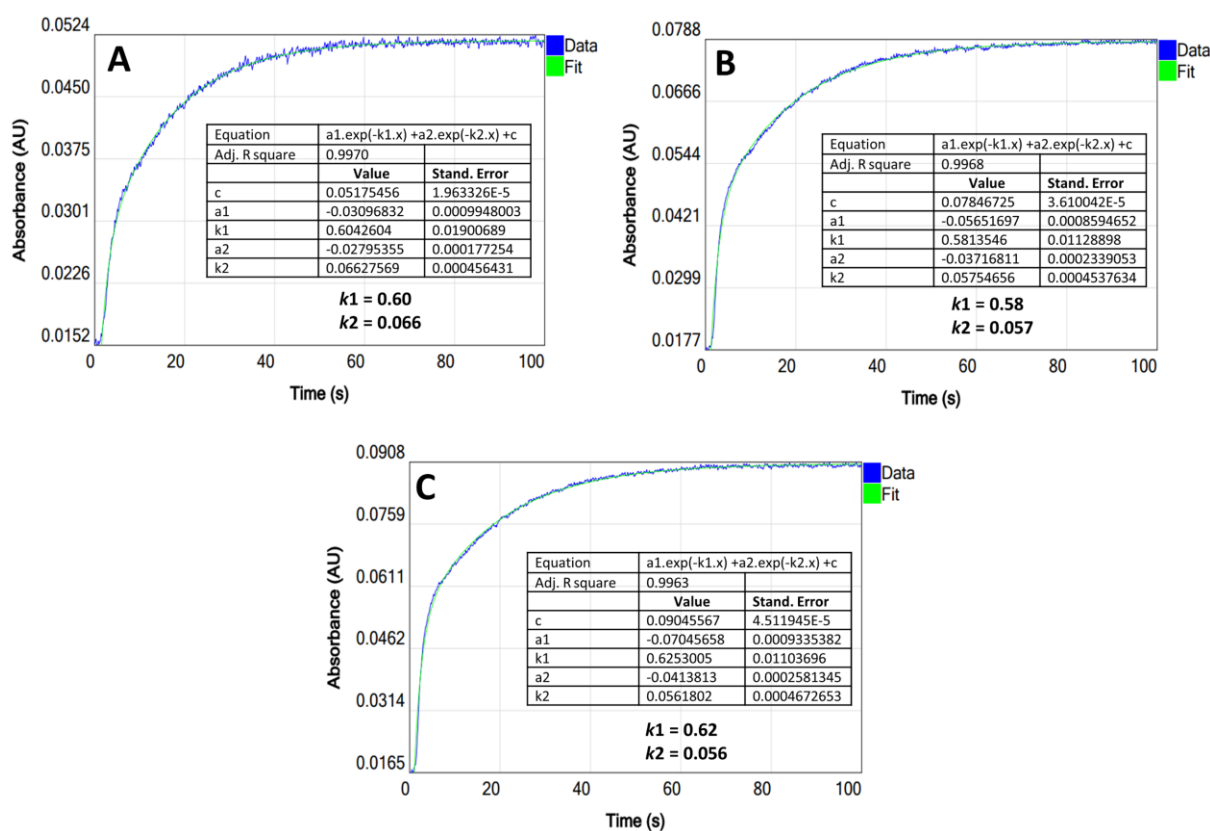

**Figure S4.** Typical kinetic curves of the reaction of Rh<sup>0</sup>-NP@PW<sub>12</sub>O<sub>40</sub><sup>3-</sup> with three different concentrations of PW<sub>12</sub>O<sub>40</sub><sup>3-</sup> with H<sub>2</sub> saturated water (pH = 1.5) at 490 nm.

**Table S1.** The *k*<sub>obs</sub> values and the ratio of their absorbance for three different concentrations of PW<sub>12</sub>O<sub>40</sub><sup>3-</sup> (0.0001, 0.0002, and 0.0003 mol/L) by maintaining a constant concentration of surface Rh atoms (3.32 × 10<sup>-5</sup> mol/L) and H<sub>2</sub> (0.00040 mol/L).

| Concentration of<br>H <sub>3</sub> PW <sub>12</sub> O <sub>40</sub><br>(mol/L) | <i>k</i> <sub>obs</sub> s <sup>-1</sup><br>in Rh <sup>0</sup> -POM<br><i>k</i> <sub>1</sub> | <i>k</i> <sub>obs</sub> s <sup>-1</sup><br>in Rh <sup>0</sup> -POM<br><i>k</i> <sub>2</sub> | Ratio of<br>Absorbance<br>A <sub>1</sub> /A <sub>2</sub> |
|--------------------------------------------------------------------------------|---------------------------------------------------------------------------------------------|---------------------------------------------------------------------------------------------|----------------------------------------------------------|
| 0.00010                                                                        | 0.60                                                                                        | 0.066                                                                                       | 1.10                                                     |
| 0.00020                                                                        | 0.58                                                                                        | 0.057                                                                                       | 1.50                                                     |
| 0.00030                                                                        | 0.62                                                                                        | 0.056                                                                                       | 1.70                                                     |

## Rh dependence

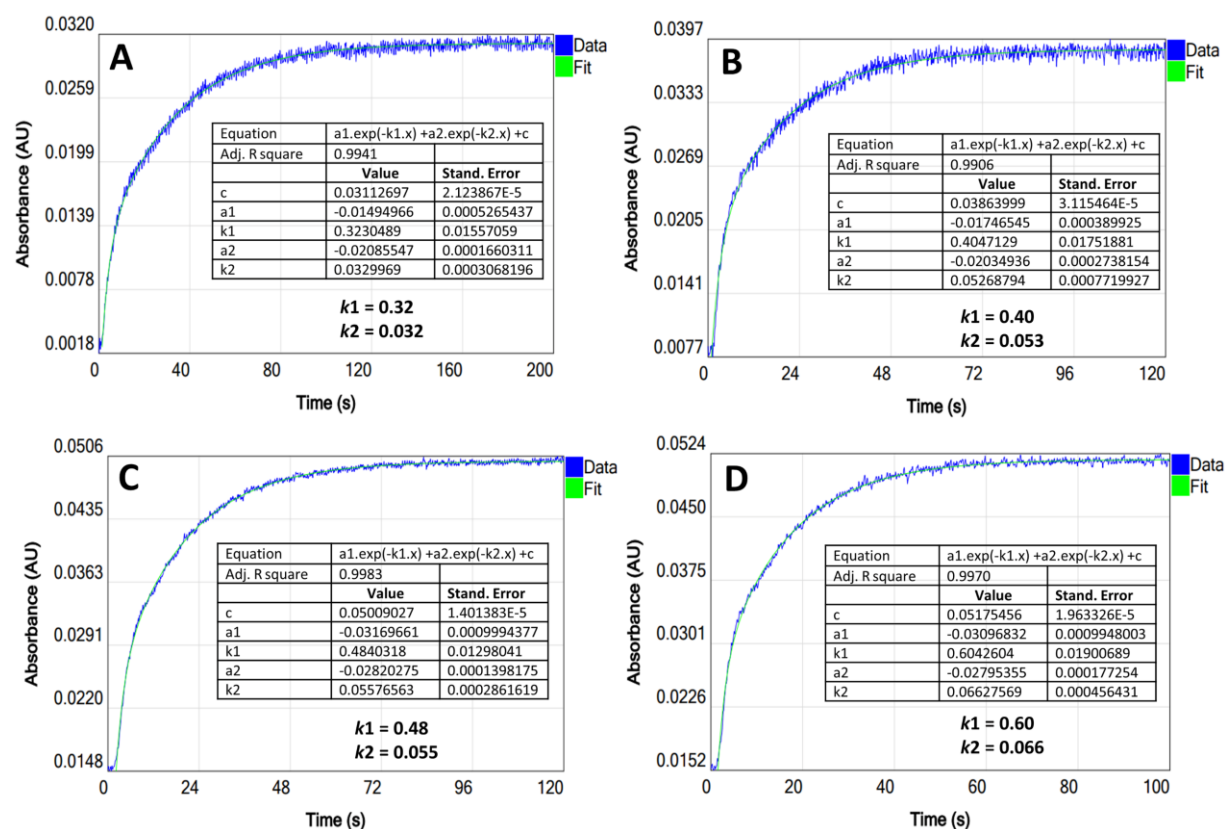

**Figure S5.** A typical kinetic curve of the reaction of  $\text{Rh}^0\text{-NP@PW}_{12}\text{O}_{40}^{3-}$  with four different concentrations of surface Rh atoms with  $\text{H}_2$  saturated water (pH – 1.6) at 490 nm.

**Table S2.** The  $k_{\text{obs}}$  values and the ratio of their absorbance for four different concentrations of surface Rh atoms by maintaining a constant concentration of  $\text{PW}_{12}\text{O}_{40}^{3-}$  (0.00010 mol/L) and  $\text{H}_2$  (0.00040 mol/L).

| Concentration of Rh atoms on the surface (mol/L) | $k_{\text{obs}} \text{ s}^{-1}$ in $\text{Rh}^0\text{-POM}$ $k_1$ | $k_{\text{obs}} \text{ s}^{-1}$ in $\text{Rh}^0\text{-POM}$ $k_2$ | Ratio of Absorbance A1/A2 |
|--------------------------------------------------|-------------------------------------------------------------------|-------------------------------------------------------------------|---------------------------|
| $5.31 \times 10^{-6}$                            | 0.32                                                              | 0.032                                                             | 0.70                      |
| $1.32 \times 10^{-5}$                            | 0.40                                                              | 0.053                                                             | 0.81                      |
| $2.65 \times 10^{-5}$                            | 0.48                                                              | 0.055                                                             | 1.0                       |
| $3.32 \times 10^{-5}$                            | 0.60                                                              | 0.066                                                             | 1.10                      |

## H<sub>2</sub> dependence

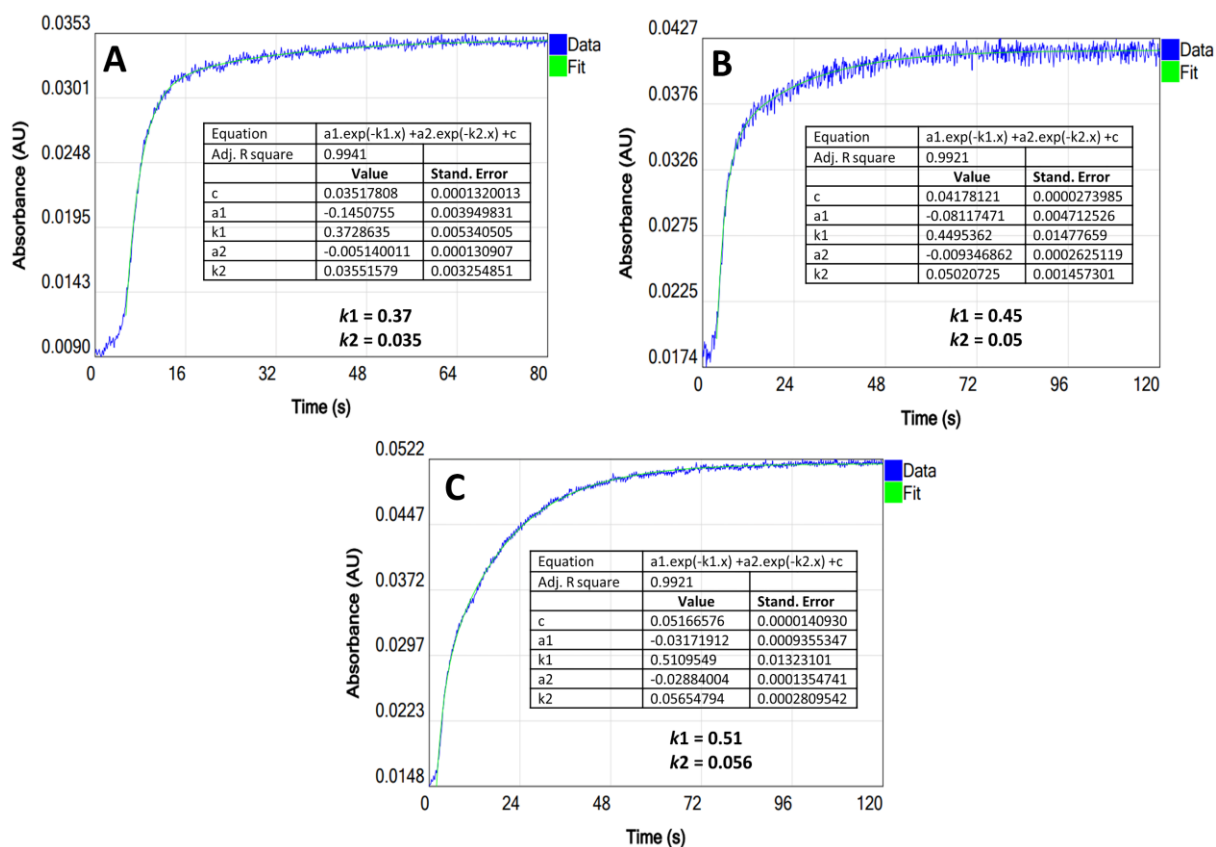

**Figure S6.** A typical kinetic curve of the reaction Rh<sup>0</sup>-NP@PW<sub>12</sub>O<sub>40</sub><sup>3-</sup> with three different concentrations of H<sub>2</sub> saturated water (pH 1.5) at 490 nm.

**Table S3.** The  $k_{\text{obs}}$  values and the ratio of their absorbance for four different concentrations of H<sub>2</sub> by maintaining a constant concentration of PW<sub>12</sub>O<sub>40</sub><sup>3-</sup> (0.00010 mol/L) and surface Ir atoms ( $3.32 \times 10^{-5}$  mol/L).

| Concentration of H <sub>2</sub> (mol/L) | $k_{\text{obs}} \text{ s}^{-1}$ in Ir <sup>0</sup> -POM<br><b>k1</b> | $k_{\text{obs}} \text{ s}^{-1}$ in Ir <sup>0</sup> -POM<br><b>k2</b> | Ratio of Absorbance<br><b>A1/A2</b> |
|-----------------------------------------|----------------------------------------------------------------------|----------------------------------------------------------------------|-------------------------------------|
| 0.00020                                 | 0.39                                                                 | 0.03                                                                 | 32.0                                |
| 0.00030                                 | 0.45                                                                 | 0.05                                                                 | 9.0                                 |
| 0.00040                                 | 0.50                                                                 | 0.056                                                                | 1.10                                |

# Ir<sup>0</sup>NP@POM-H<sub>2</sub> (2.50 nm Ir)

## POM dependence

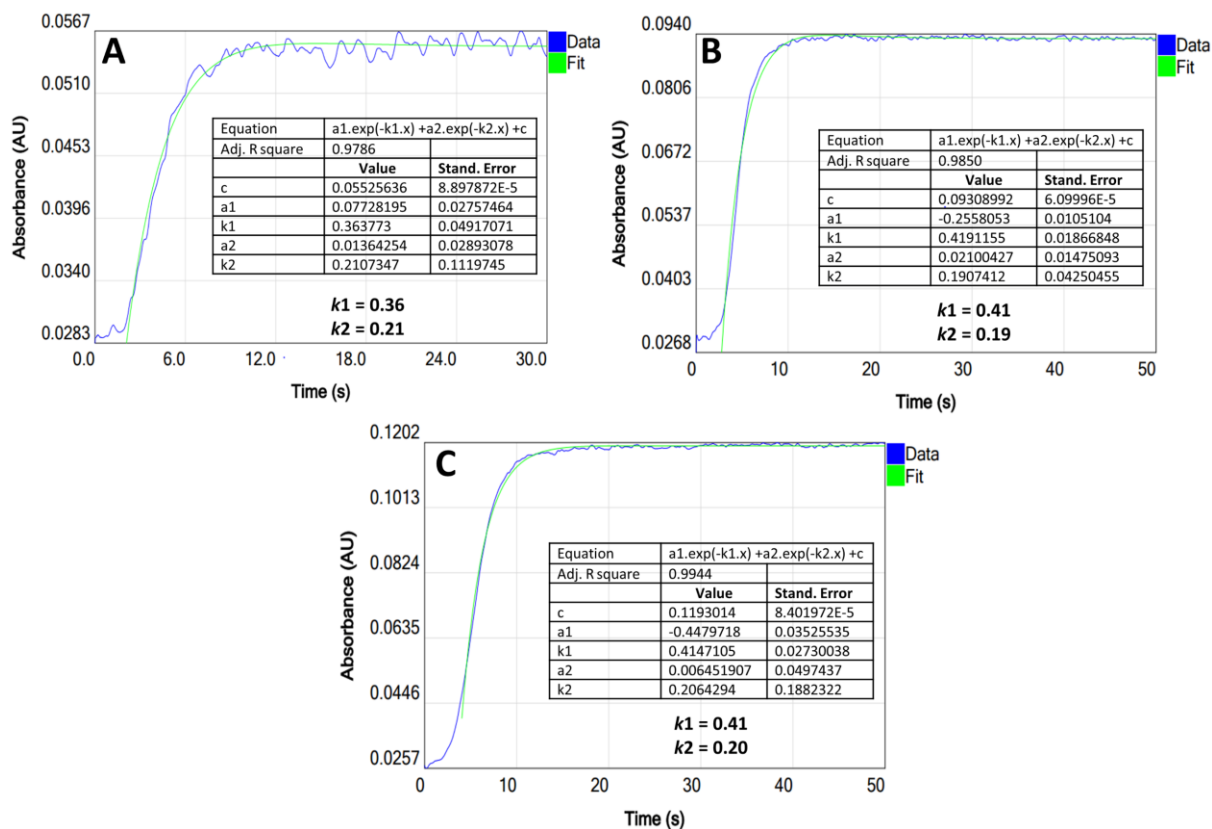

**Figure S7.** Typical kinetic curves of the reaction of Ir<sup>0</sup>-NP@PW<sub>12</sub>O<sub>40</sub><sup>3-</sup> with three different concentrations of PW<sub>12</sub>O<sub>40</sub><sup>3-</sup> with H<sub>2</sub> saturated water (pH = 1.5) at 490 nm.

**Table S4.** The  $k_{obs}$  values and the ratio of their absorbance for three different concentrations of PW<sub>12</sub>O<sub>40</sub><sup>3-</sup> (0.0001, 0.0002, and 0.0003 mol/L) by maintaining a constant concentration of surface Ir atoms ( $5.15 \times 10^{-5}$  mol/L) and H<sub>2</sub> (0.00040 mol/L).

| Concentration of H <sub>3</sub> PW <sub>12</sub> O <sub>40</sub> (mol/L) | $k_{obs}$ s <sup>-1</sup> in Ir <sup>0</sup> -POM $k_1$ | $k_{obs}$ s <sup>-1</sup> in Ir <sup>0</sup> -POM $k_2$ | Ratio of Absorbance A1/A2 |
|--------------------------------------------------------------------------|---------------------------------------------------------|---------------------------------------------------------|---------------------------|
| 0.00010                                                                  | 0.36                                                    | 0.21                                                    | 5.92                      |
| 0.00020                                                                  | 0.41                                                    | 0.19                                                    | 12.14                     |
| 0.00030                                                                  | 0.41                                                    | 0.20                                                    | 74.0                      |



## Ir dependence

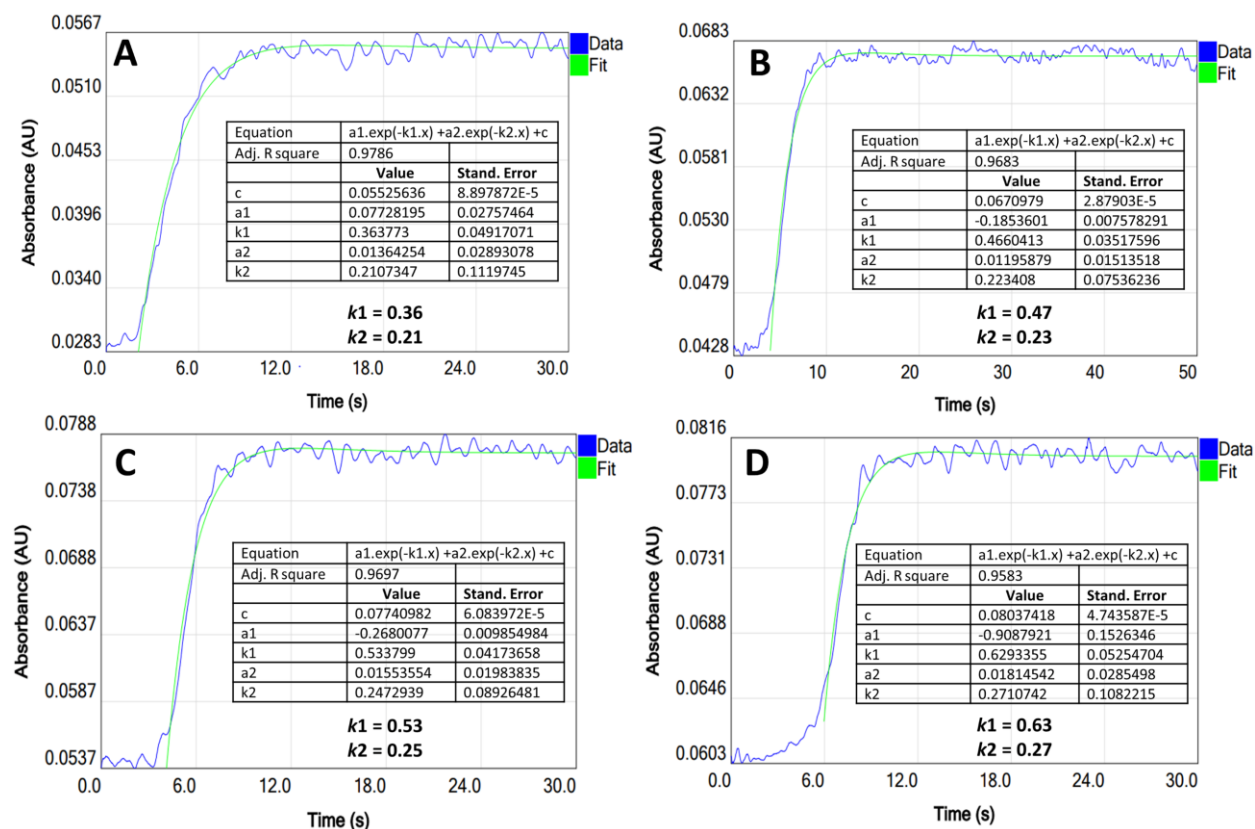

**Figure S8.** A typical kinetic curve of the reaction of  $\text{Ir}^0\text{-NP@PW}_{12}\text{O}_{40}^{3-}$  with four different concentrations of surface Ir atoms with  $\text{H}_2$  saturated water (pH – 1.6) at 490 nm.

**Table S5.** The  $k_{\text{obs}}$  values and the ratio of their absorbance for four different concentrations of surface Ir atoms by maintaining a constant concentration of  $\text{PW}_{12}\text{O}_{40}^{3-}$  (0.00010 mol/L ) and  $\text{H}_2$  (0.00040 mol/L).

| Concentration of Ir atoms on the surface (mol/L) | $k_{\text{obs}} \text{ s}^{-1}$ in $\text{Ir}^0\text{-POM}$ $k_1$ | $k_{\text{obs}} \text{ s}^{-1}$ in $\text{Ir}^0\text{-POM}$ $k_2$ | Ratio of Absorbance A1/A2 |
|--------------------------------------------------|-------------------------------------------------------------------|-------------------------------------------------------------------|---------------------------|
| $5.15 \times 10^{-5}$                            | 0.36                                                              | 0.21                                                              | 5.92                      |
| $7.73 \times 10^{-5}$                            | 0.47                                                              | 0.23                                                              | 16.50                     |
| $1.03 \times 10^{-4}$                            | 0.53                                                              | 0.25                                                              | 17.30                     |
| $1.28 \times 10^{-4}$                            | 0.63                                                              | 0.27                                                              | 50.16                     |

## H<sub>2</sub> dependence

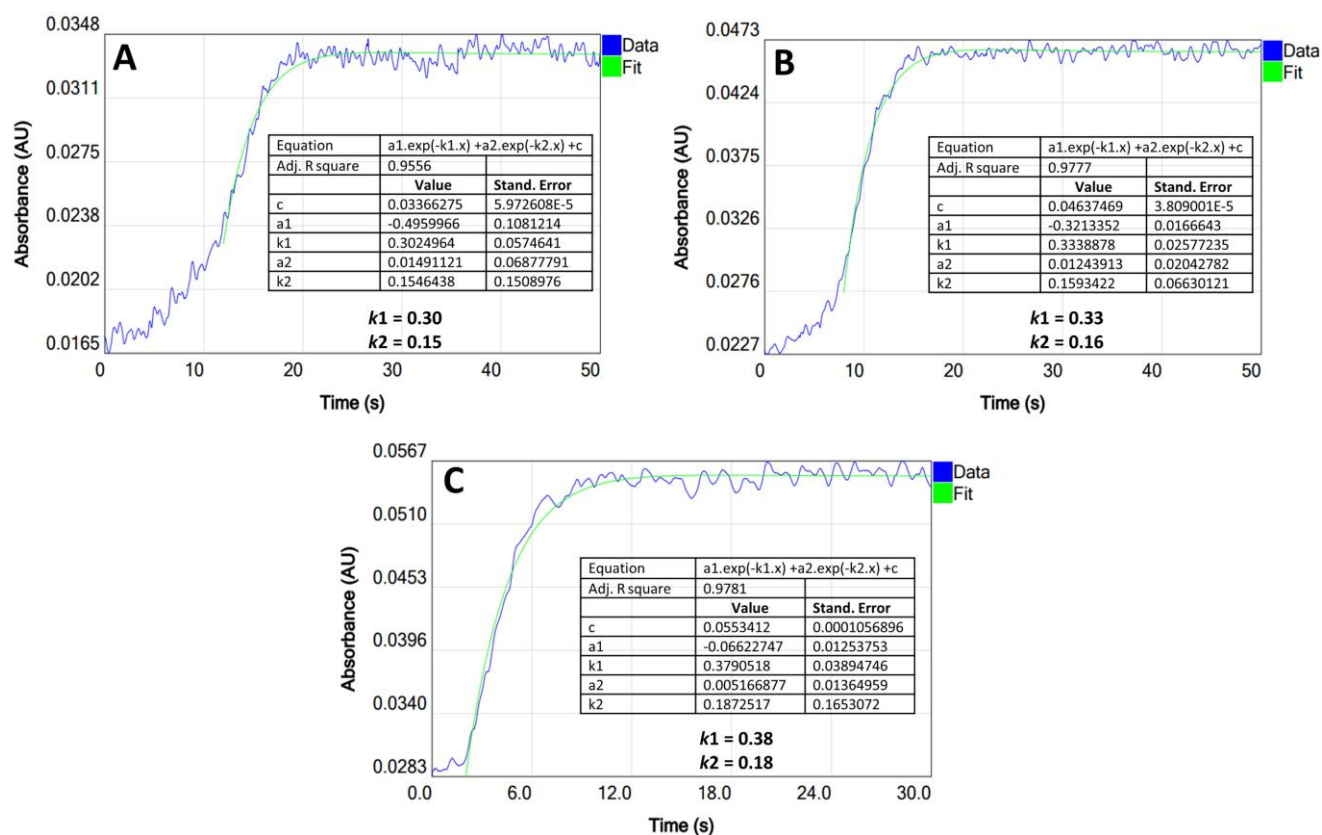

**Figure S9.** A typical kinetic curve of the reaction Ir<sup>0</sup>-NP@PW<sub>12</sub>O<sub>40</sub><sup>3-</sup> with three different concentrations of H<sub>2</sub> saturated water (pH 1.5) at 490 nm.

**Table S6.** The  $k_{\text{obs}}$  values and the ratio of their absorbance for four different concentrations of H<sub>2</sub> by maintaining a constant concentration of PW<sub>12</sub>O<sub>40</sub><sup>3-</sup> (0.00010 mol/L) and surface Ir atoms ( $5.15 \times 10^{-5}$  mol/L).

| Concentration of H <sub>2</sub> (mol/L) | $k_{\text{obs}} \text{ s}^{-1}$ in Ir <sup>0</sup> -POM<br><b>k1</b> | $k_{\text{obs}} \text{ s}^{-1}$ in Ir <sup>0</sup> -POM<br><b>k2</b> | Ratio of Absorbance<br><b>A1/A2</b> |
|-----------------------------------------|----------------------------------------------------------------------|----------------------------------------------------------------------|-------------------------------------|
| 0.00020                                 | 0.30                                                                 | 0.15                                                                 | 32.88                               |
| 0.00036                                 | 0.33                                                                 | 0.16                                                                 | 25.88                               |
| 0.00040                                 | 0.38                                                                 | 0.18                                                                 | 13.20                               |

# Rh-H<sub>2</sub>-POM

## Rh dependence

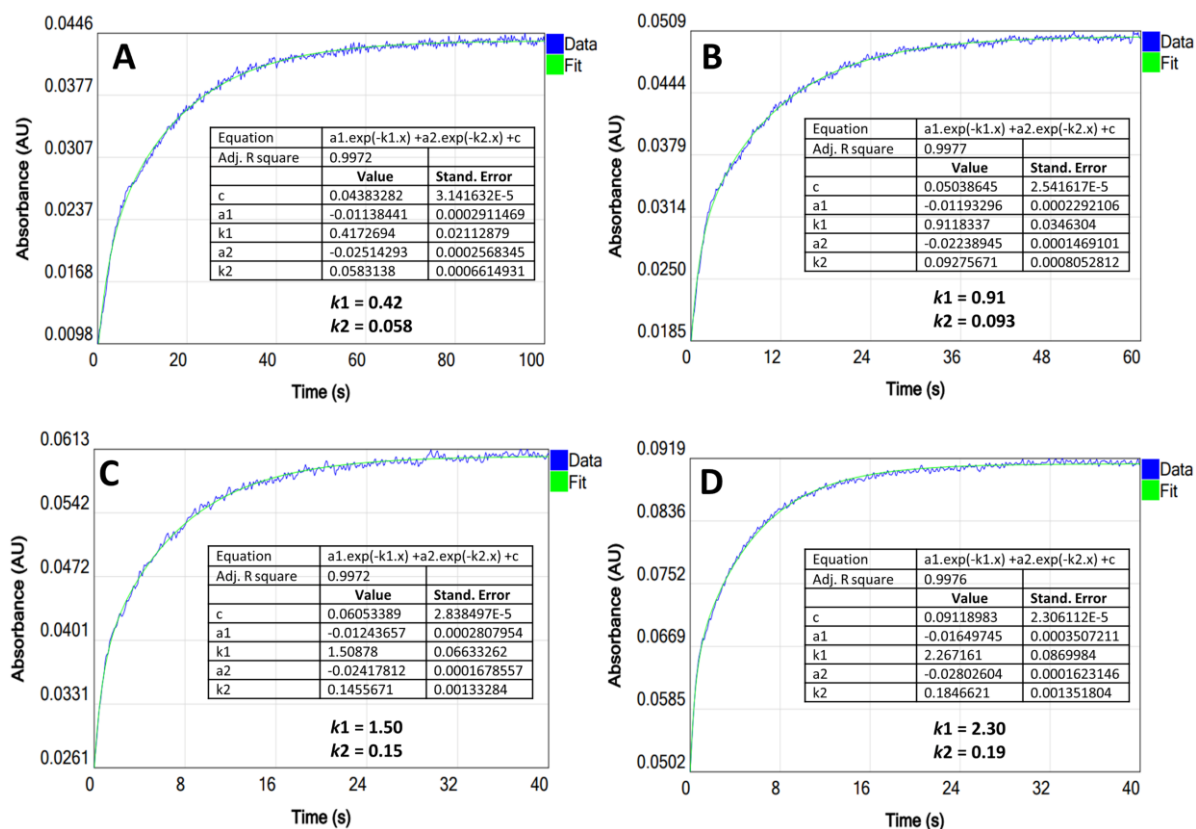

**Figure S10.** A typical kinetic curve of the reaction of Rh<sup>0</sup>-NP-H<sub>2</sub> with four different concentrations of surface Rh atoms at 490 nm.

**Table S7.** The  $k_{\text{obs}}$  values and the ratio of their absorbance for four different concentrations of surface Rh atoms by maintaining a constant concentration of PW<sub>12</sub>O<sub>40</sub><sup>3-</sup> (0.00010 mol/L) and H<sub>2</sub> (0.00040 mol/L).

| Concentration of Rh atoms on the surface (mol/L) | $k_{\text{obs}}$ s <sup>-1</sup> in Rh <sup>0</sup> -POM k1 | $k_{\text{obs}}$ s <sup>-1</sup> in Rh <sup>0</sup> -POM k2 | Ratio of Absorbance A1/A2 |
|--------------------------------------------------|-------------------------------------------------------------|-------------------------------------------------------------|---------------------------|
| $1.32 \times 10^{-5}$                            | 0.42                                                        | 0.058                                                       | 0.44                      |
| $2.65 \times 10^{-5}$                            | 0.91                                                        | 0.093                                                       | 0.50                      |
| $3.32 \times 10^{-5}$                            | 1.50                                                        | 0.150                                                       | 0.52                      |
| $6.64 \times 10^{-5}$                            | 2.30                                                        | 0.190                                                       |                           |

# Ir-H<sub>2</sub>-POM

## Ir dependence

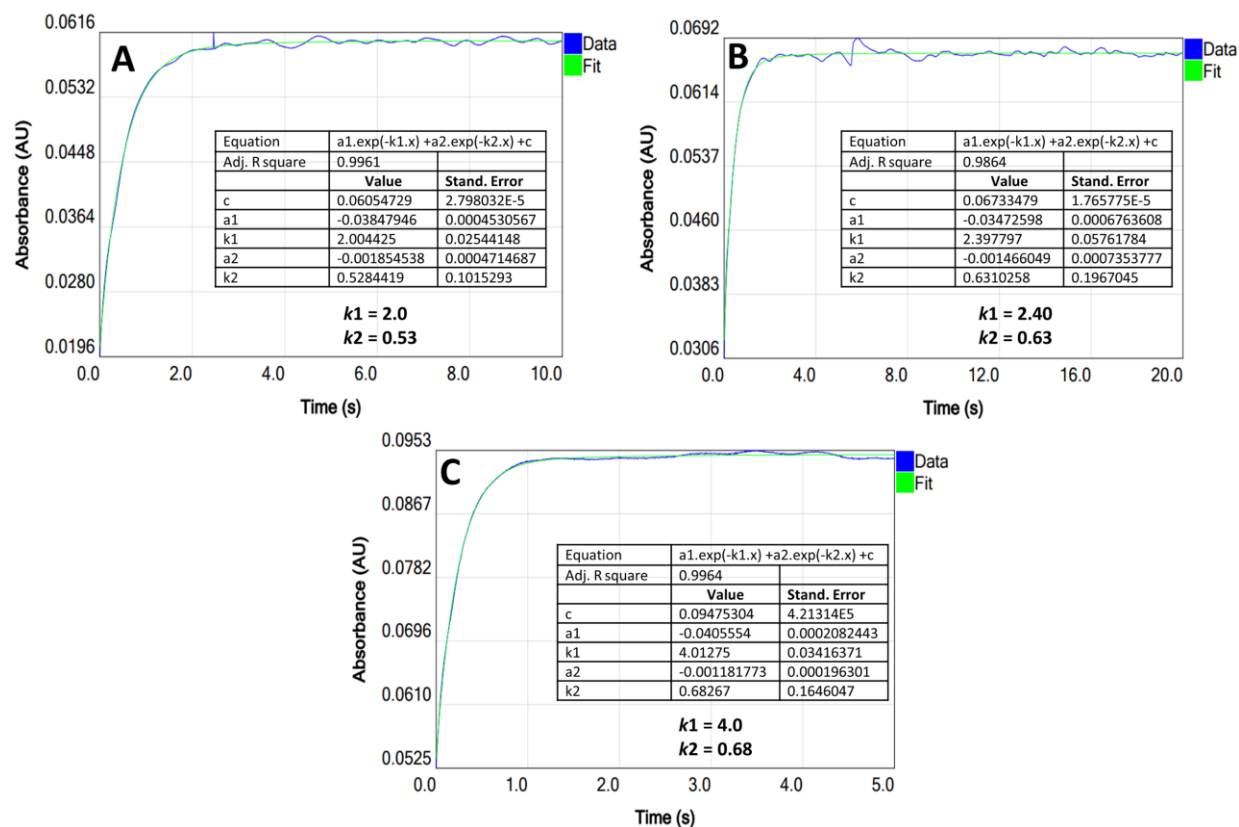

**Figure S11.** A typical kinetic curve of the reaction of Ir<sup>0</sup>-NP-H<sub>2</sub> with four different concentrations of surface Ir atoms at 490 nm.

**Table S8.** The  $k_{obs}$  values and the ratio of their absorbance for four different concentrations of surface Ir atoms by maintaining a constant concentration of PW<sub>12</sub>O<sub>40</sub><sup>3-</sup> (0.00010 mol/L) and H<sub>2</sub> (0.00040 mol/L).

| Concentration of Ir atoms on the surface (mol/L) | $k_{obs}$ s <sup>-1</sup> in Ir <sup>0</sup> -POM k1 | $k_{obs}$ s <sup>-1</sup> in Ir <sup>0</sup> -POM k2 | Ratio of Absorbance A1/A2 |
|--------------------------------------------------|------------------------------------------------------|------------------------------------------------------|---------------------------|
| $5.15 \times 10^{-5}$                            | 2.0                                                  | 0.53                                                 | 21.33                     |
| $7.73 \times 10^{-5}$                            | 2.40                                                 | 0.63                                                 | 25.0                      |
| $1.28 \times 10^{-4}$                            | 4.0                                                  | 0.68                                                 | 36.36                     |
